# Supplementary material for: Seasonal dispersal and longitudinal migration in the Relict Gull Larus relictus across the Inner-Mongolian Plateau
Source: PeerJ. 2017 May 25;5:e3380. doi: 10.7717/peerj.3380 (PMC5446770; doi:10.7717/peerj.3380)
Supplement: Data S1 — Different pre-breeding areas are indicated by colors. red-Ordos wetlands, blue-Yellow River strech at Baotou, green-Tuoketuo, grey-Daihai Lake, orange-Wulanhushaohaizi, purple-Wuliangsuhai, white-whole breeding season at Ordos. ∗ indicates signal lost. ∗∗signals were commonly lost for several days due to inclement weather in winter. [file peerj-05-3380-s007.xlsx]

## Sheet: Sheet1
Raw data S1: Migration details on timing, stopovers and seasonal dispersals
	Autumn migration departure date	Stopovers					Wintering arrival date	Wintering ground dispersal**					Spring migration departure date	stopover	HongjianNur arrival date	Left for pre-breeding dispersal area	Pre-breeding dispersal areas				Back to Hongjian Nur	Remarks
Individual		1	2	3	4	5		Bohai Bay	Laizhou Bay	Coast of East Sea	Laizhou Bay	Bohai Bay					1	2	3	4
G3	2008-08-01	—	—	—	—	—	2008-08-03	2008.8.3~2009.1.3	2009.1.3~2.12	—	—	2009.2.20~4.8	2009-04-08	2009.4.8~4.14	2009-04-15	—	—	—	—	—	—
	2009-07-31	2009.8.1~8.2	—	—	—	—	2009-08-03	2009.8.3~11.30*	—	—	—	—	—	—	—	—	—	—	—	—	—
G4	2008-07-26	2008.7.27~8.3	2008.8.4~8.28	2008.8.29-8.30	—	—	2008-09-01	2008.9.1~2009.4.4	—	—	—	—	2009-04-04	—	2009-04-06	—	—	—	—	—	—
	2009-07-28	2008.7.29~7.31	2008.8.1~8.3	2008.8.5~8.11	2008.8.13~8.22	2008.8.23~8.26	2009-08-27	2009.8.27~12.16	2010.1.19~2.19	—	—	2010.2.26~4.5	2010-04-05	—	2010-04-09	2010.4.11	2010.4.13~5.2	—	—	—	2010.5.3
	2010-08-11	2010.8.13~8.19	2010.8.20~9.10	—	—	—	2010-09-11	2010.9.11~2011.4.4	—	—	—	—	2011-04-05	—	2011-04-12	2011.4.16	2011.4.16~4.28	—	—	—	2011.4.29	no data 2010.11.27~2011.2.2
	2011-07-26	2011.7.27~7.31	2011.7.31~9.3	—	—	—	2011-09-06	2011.9.6~2012.4.6	—	—	—	—	2012-04-06	—	2012-04-07	2012.4.11	2012.4.11~4.27	—	—	—	2011.4.28	no data 2011.10.31~2012.2.11
G5	2008-08-03	2008.8.5~8.17	—	—	—	—	2008-08-19	2008.8.19~2009.1.10	2009.1.13~3.19	—	—	2009.3.22~3.31	2009-03-31	—	2009-04-06	2009.4.9	2009.4.9~4.28	—	—	—	2009.4.28
	2009-07-18	2009.7.19~8.3	2009.8.4~8.6	2009.8.7~8.10	—	—	2009-08-11	2009.8.11~2010.1.14	2010.1.15~2010.3.3	—	—	2010.3.7~2010.3.31	2010-04-01	—	2010-04-03	2010.4.6	2010.4.7~4.11	2010.4.12~4.15	2010.4.16~4.29	2010.4.30~5.2	2010.5.3
	2010-07-30	2010.7.30~8.9	2010.8.11~8.13	—	—	—	2010-08-14	2010.8.14~2011.1.4	2011.1.10~3.27	—	—	2010.3.28~4.8	2011-04-08	—	2011-04-11	2011.4.14	2011.4.16~4.23	2011.4.24~4.29	—	—	2011.4.29
	2011-07-27	—	—	—	—	—	2011-07-28	2011.7.28~2012.2.4	2012.2.5~4.3	—	—	2012.4.5~4.10	2012-04-10	—	2012-04-14	2012.4.15	2012.4.17~4.28	—	—	—	2012.4.29
	2012-08-03	2012.8.4~8.16	—	—	—	—	2012-08-17	2012.8.17~9.17	—	—	—	—	—	—	—	—	—	—	—	—	—	no data 2012.9.18~2013.4.25
G6	2008-08-02	2008.8.4~8.11	—	—	—	—	2008-08-12	2008.8.12~10.13*	—	—	—	—	—	—	—	—	—	—	—	—	—
G7	2008-07-22	2008.7.22~7.28	2008.8.1~8.2	—	—	—	2008-08-03	2008.8.3~12.17	2009.1.1~3.16	—	—	2009.3.17~4.9	2009-04-10	2009.4.11~4.12	2009-04-13	2009.4.20	2009.4.21~4.26	—	—	—	2009.4.27
	2009-07-21	—	—	—	—	—	2009-07-22	2009.7.22~12.12	2010.1.6~2.18	—	—	2010.2.25~4.1	2010-04-02	—	2010-04-07	2010.4.10	2010.4.11~4.15*	—	—	—	—
G8	2010-09-02	2010.9.4~9.5	2010.9.6~9.20	—	—	—	2010-09-24	2010.9.24~11.28	2010.12.29~2011.1.4*	—	—	—	—	—	—	—	—	—	—	—	—
G9	2010-07-30	2010.7.31~8.13	—	—	—	—	2010-08-14	2010.8.14~12.21	2011.1.6~3.3*	—	—	—	—	—	—	—	—	—	—	—	—
G10	2010-08-13	—	—	—	—	—	2010-08-14	2010.8.14~9.17*	—	—	—	—	—	—	—	—	—	—	—	—	—
G11	2010-07-26	2010.7.28~8.2	2010.8.3~8.4	—	—	—	2010-08-05	2010.8.5~12.7	2010.12.11~12.24	2011.1.12~1.23	2011.1.28~3.30	2011.3.31~4.3	2011-04-03	2011.4.3~4.4	2011-04-05	—	—	—	—	—	—
	2011-07-21	—	—	—	—	—	2011-07-23	2011.7.23~10.25	20112.1.8~3.30	—	—	—	2012-03-31	—	2012-04-03	2012.4.8	2012.4.8~7.21	—	—	—	—
	2012-07-21	—	—	—	—	—	2012-07-23	2012.7.23~9.1*	—	—	—	—	—	—	—	—	—	—	—	—	—
Different pre-breeding areas are indicated by colors. red-Ordos wetlands, blue-Yellow River strech at Baotou, green-Tuoketuo, grey-Daihai Lake, orange-Wulanhushaohaizi, purple-Wuliangsuhai, white-whole breeding season at Ordos. * indicates signal lost. **signals were commonly lost for several days due to inclement weather in winter.
