# Supplementary material for: Seasonal dispersal and longitudinal migration in the Relict Gull Larus relictus across the Inner-Mongolian Plateau
Source: PeerJ. 2017 May 25;5:e3380. doi: 10.7717/peerj.3380 (PMC5446770; doi:10.7717/peerj.3380)
Supplement: Data S2 — Red texts indicate incomplete wintering data which were not included in the analysis. [file peerj-05-3380-s008.xlsx]

## Sheet: Sheet1
Raw data S2: Longitudinal migration character
Individual	Year	Breeding onset position (Y, X)		Wintering position (Y, X)		Breeding arrival position (Y, X)		Δautumn mig Y/X		Δspring mig Y/X
G3	2008-2009	39.045	109.974	37.286	119.261	39.078	109.858	1.759	9.287	1.792	9.403
	2009-2010	39.114	109.884	38.732	118.145	——	——	0.382	8.261
G4	2008-2009	39.08	109.916	38.346	118.082	39.155	109.948	0.734	8.166	0.809	8.134
	2009-2010	39.061	109.908	37.11	119.619	39.107	109.91	1.951	9.711	1.997	9.709
	2010-2011	39.077	109.918	37.158	119.299	39.088	109.921	1.919	9.381	1.93	9.378
	2011-2012	39.083	109.892	38.366	118.175	39.073	109.884	0.717	8.283	0.707	8.291
G5	2008-2009	39.129	109.875	37.22	119.18	39.13	109.885	1.909	9.305	1.91	9.295
	2009-2010	39.188	109.025	37.221	119.28	39.09	109.893	1.967	10.255	1.869	9.387
	2010-2011	39.225	109.894	37.345	119.171	39.097	109.91	1.88	9.277	1.752	9.261
	2011-2012	39.095	109.839	37.114	119.627	39.125	109.918	1.981	9.788	2.011	9.709
G6	2008-2009	39.13	109.548	38.185	117.99	——	——
G7	2008-2009	39.075	109.585	37.219	119.292	39.184	109.286	1.856	9.707	1.965	10.006
	2009-2010	39.082	109.569	37.15	119.291	39.091	109.908	1.932	9.722	1.941	9.383
G8	2010-2011	39.096	109.918	37.143	119.303	——	——	1.953	9.385
G9	2010-2011	39.107	109.914	37.218	119.235	——	——	1.889	9.321
G10	2010-2011	39.106	109.882	38.153	118.013	——	——
G11	2010-2011	39.091	109.876	36.446	120.822	39.099	109.684	2.645	10.946	2.653	11.138
	2011-2012	39.087	109.953	37.154	119.299	39.129	109.844	1.933	9.346	1.975	9.455
	2012-2013	39.39	109.114	38.268	117.855	——	——
red texts indicate incomplete wintering data which were not included in the analysis
