# Supplementary material for: Seasonal dispersal and longitudinal migration in the Relict Gull Larus relictus across the Inner-Mongolian Plateau
Source: PeerJ. 2017 May 25;5:e3380. doi: 10.7717/peerj.3380 (PMC5446770; doi:10.7717/peerj.3380)
Supplement: Data S3 [file peerj-05-3380-s009.xlsx]

## Sheet: Sheet1
Raw data S3: Variables for between-individual test in migration timing and route
Gulls	autumn				spring
	dep date	lat 114E	arri date	mig duration	dep date	lat 114E	arri date	mig duration
G3	8.1	39.3	8.3	2	4.8	41.09	4.15	7
	7.31	41.3	8.3	3
G4	7.26	41.41	9.1	37	4.4	38.81	4.6	2
	7.28	41.52	8.27	30	4.5	38.89	4.9	4
	8.11	41.47	9.11	31	4.5	39.31	4.12	7
	7.26	41.46	9.6	42	4.6	39.61	4.7	1
G5	8.3	41.53	8.19	16	3.31	39.19	4.6	6
	7.18	41.54	8.11	24	4.1	39.88	4.3	2
	7.30	41.53	8.14	15	4.8	39.14	4.11	3
	7.27	39.12	7.28	1	4.10	38.95	4.14	4
	8.3	41.54	8.17	14
G6	8.2	40.86	8.12	10
G7	7.22	41.52	8.3	12	4.10	40.86	4.13	3
	7.21	41.15	7.22	1	4.2	39.33	4.7	5
G8	9.2	39.94	9.24	22
G9	7.30	40.04	8.14	15
G10	8.13	39.02	8.14	1
G11	7.26	41.07	8.5	10	4.3	39.44	4.5	2
	7.21	39.53	7.23	2	3.31	39.22	4.3	3
	7.21	39.76	7.23	2
