# Supplementary material for: Seasonal dispersal and longitudinal migration in the Relict Gull Larus relictus across the Inner-Mongolian Plateau
Source: PeerJ. 2017 May 25;5:e3380. doi: 10.7717/peerj.3380 (PMC5446770; doi:10.7717/peerj.3380)
Supplement: Table S4 — All of the recorded gulls were banded when they were chicks. The recovery records indicate that juveniles distribute in a larger wintering range relative to satellite tracked adults. Data were accessed from China National Bird Banding Database ( http://www.chinanbbc.net). [file peerj-05-3380-s004.doc]

**Table S4: Recovery records of juvenile Relict Gulls (≤two-year-old)** **in non-breeding season.**

All of the recorded gulls were banded when they were chicks. The recovery records indicate that juveniles distribute in a larger wintering range relative to satellite tracked adults. Data were accessed from China National Bird Banding Database ([http://www.chinanbbc.net](http://www.chinanbbc.net/)).

| **Metal ring code** | **Legflag code** | **Banding site** | **Banding coordinate** | **Banding date** | **Recovery site** | **Recovery coordinate** | **Recovery date** |
| --- | --- | --- | --- | --- | --- | --- | --- |
| M-264059 | — | Alakol Lake, Kazakhstan | 46°6.0N, 81°50.0E | 1975-6-21 | Huimin, China | 37°30.0N, 117°30.0E | 1977-2-12 |
| M-352309 | — | Alakol Lake, Kazakhstan | 46°6.0N, 81°50.0E | 1977-6-24 | Yimen, China | 24°40.0N, 102°10.0E | 1978-8-1 |
| I08-8073* | — | Hongjian Nur, China | 398.3N, 10952.2E | 2007-6-26 | Dongtai, China | 3247.0N, 12021.0E | 2008-6-2 |
| I03-3028 | 15 | Hongjian Nur, China | 398.3N, 10952.2E | 2008-6-25 | Luannan, China | 393.80N, 11813.1E | 2009-5-25 |
| I03-3141 | C0 | Hongjian Nur, China | 398.3N, 10952.2E | 2008-6-25 | Luannan, China | 393.80N, 11813.1E | 2009-5-25 |
| I03-3143 | C2 | Hongjian Nur, China | 398.3N, 10952.2E | 2008-6-25 | Luannan, China | 393.80N, 11813.1E | 2009-5-25 |
| I03-3009 | 25 | Hongjian Nur, China | 398.3N, 10952.2E | 2008-6-25 | Luannan, China | 393.80N, 11813.1E | 2009-5-28 |
| C-810482 | — | Tandinskiy, Russia | 5119.9N, 9431.1E | 2008-6-27 | Jinzhou, China | 396.1N, 12141.2E | 2008-11-20 |

* This bird was found died
